# Supplementary material
Source: PubMed Central journal article supplement (PMC4660261)

## SUPPLEMENTAL FIGURES LEGENDS

### **Figure S1: Eligibility traces are not affected by cholinergic receptors and can be induced by standard depolarization pairing paradigms. Related to Figure 1.**

(A) 5 min puff of 250  $\mu$ M CCh following post-pre conditioning did not alter synaptic strength (CCh only:  $91.5 \pm 13.8\%$ ; Pairing + CCh:  $104.0 \pm 5.6\%$ ). (B) Puffing CCh (250  $\mu$ M) for 5 min before the post-pre pairing promoted LTD (CCh only:  $108.0 \pm 10.0\%$ ; CCh + Pairing:  $68.4 \pm 4.4\%$ ,  $p = 0.008$  compared to baseline). (C) NE (50 $\mu$ M, 10 sec) puffed after low frequency stimulation (200 pulses at 10Hz) paired with postsynaptic depolarization to -10 mV, but not pairing alone, allows LTP induction in slices from mice treated with reserpine to deplete monoamines (see Methods) (paired+puff:  $131.3 \pm 7.1\%$ ,  $p = 0.006$ ; paired only:  $101.4 \pm 4.6\%$ ). (D) Similarly, pairing low frequency stimulation (200 pulses at 10Hz) with postsynaptic depolarization to -40 mV in slices from mice treated with reserpine did not induce LTD (paired only:  $106.3 \pm 7.0\%$ ), but 5-HT (50 $\mu$ M, 10 sec) puffed after pairing promoted significant LTD (paired+puff:  $78.2 \pm 6.8\%$ ,  $p = 0.03$ ).

### **Figure S2: Specific expression of ChR2 in LC noradrenergic neurons in TH-ChR2 mice. Related to Figure 2.**

(A) Image from a mouse brain atlas showing the coronal slice containing the locus coeruleus (LC, highlighted with a white box). (B) Fluorescent image of TH-ChR2 mouse LC. YFP is specifically expressed (green) in noradrenergic neurons (yellow arrowhead). The 4th ventricle (right upper corner) was used as the landmark. (C) Primary visual cortical slice under low magnification (10X, tile image). Noradrenergic fibers are shown in green, and the recorded L2/3 neuron labeled with biocytin and secondary antibody are shown in red. (D) Biocytin-labeled V1 L2/3 neuron from a TH-ChR2 brain slice (40X).

### **Figure S3. Transformation of LTP eligibility traces is mediated by $\beta$ AR activation and intracellular cAMP. Related to Figure 5.**

(A)  $\beta$ AR activation by Iso (50  $\mu$ M, 10 s) mimicked the transformation of the LTP eligibility trace by NE (pre-post:  $129.1 \pm 6.7\%$ ,  $p = 0.003$ ; post-pre:  $104.5 \pm 4.6\%$ ;  $p = 0.008$  between p1 and p2). (B) Iso alone (50  $\mu$ M 10 s, triangle:  $97.7 \pm 5.0\%$ ) or following presynaptic stimulations (200 pulses at 10 Hz, circle:  $97.3 \pm 9.0\%$ ) did not change synaptic strength. (C) Experimental design for elevating intracellular cAMP by uncaging. (D) Elevation of intracellular cAMP alone did not significantly affect synaptic transmission (light only:  $91.8 \pm 4.4\%$ ), but consolidated the LTP

eligibility trace induced by pre-post conditioning (magenta dot, Pairing + light:  $117.8 \pm 5.5\%$ ,  $p = 0.008$ .  $p = 0.004$  between two pathways).

**Figure S4. Normal expression of paired LTP/D with the C-terminus peptide of  $\beta$ 2AR/5-HT2CR. Related to Figure 5.**

**(A)** LTP was induced by pairing low-frequency stimulation with membrane depolarization to 0 mV (pairing protocol shown in upper panel) with 50  $\mu$ M DSPL in the internal pipette solution ( $185.8 \pm 36.8\%$ ,  $p = 0.046$ , paired t-test). **(B)** Paired LTD was successfully induced (LFS paired with depolarization to -40 mV, upper panel) with 50  $\mu$ M 2C-ct peptide in the internal pipette solution ( $75.0 \pm 0.9\%$ ,  $p = 0.0005$ , paired t-test).

**Figure S5. Properties of network training, raster plots, reversal of reward times, and sensitivity to parameters. Related to Figure 7.**

Training a network of 100 neurons with different reward timing. Network activity was initiated by a 100 ms stimulus of feed-forward drive from LGN (dashed vertical magenta line). Panels **A1-A3** show raster plots of the complete network for three instances during training, corresponding to those shown in Fig. 7. Here, the reward is delivered 1000 ms after the stimulus offset (vertical magenta line). **(A1)** Network before, **(A2)** during (18 trials), and **(A3)** after training (50 trials). **(B)** Subsequently, reward delivery was delayed by an extra 500ms. **(B1)** Starting point (identical to **A3**), **(B2)** after another 23 training trials, and **(B3)** after an additional 65 trials. **(C)** Next, the reward was shifted back to the original delay (1000 ms). **(C1)** Initial condition (identical to **B3**), **(C2)** after training for 2 more trials, **(C3)** after the network converges back to the original reward time (compare with **A3**). At the end of training, the network activity decays before the reward is delivered, as seen in the raster plots. **(D)** Three examples with different parameters show that network activity after training decays prior to the reward, and that the timing of the decay is parameter-dependent. The interval between reward time (R) and decay of network activity (defined by crossing a threshold from above, as shown by horizontal dashed line), defined as  $D$ , is parameter-dependent. **(E)** Examples of how the interval,  $D$ , depends on the parameters of the learning rule (+ symbols, colors denote the values of the  $\tau_d$  parameter). These are compared to an analytical approximation of  $D$  (colored dashed lines), which has the form:

$$D = \log(T_{max}^p / T_{max}^d) \tau_d \tau_p / (\tau_p - \tau_d)$$

(see Mathematical Model in the Experimental Procedures section for derivation).

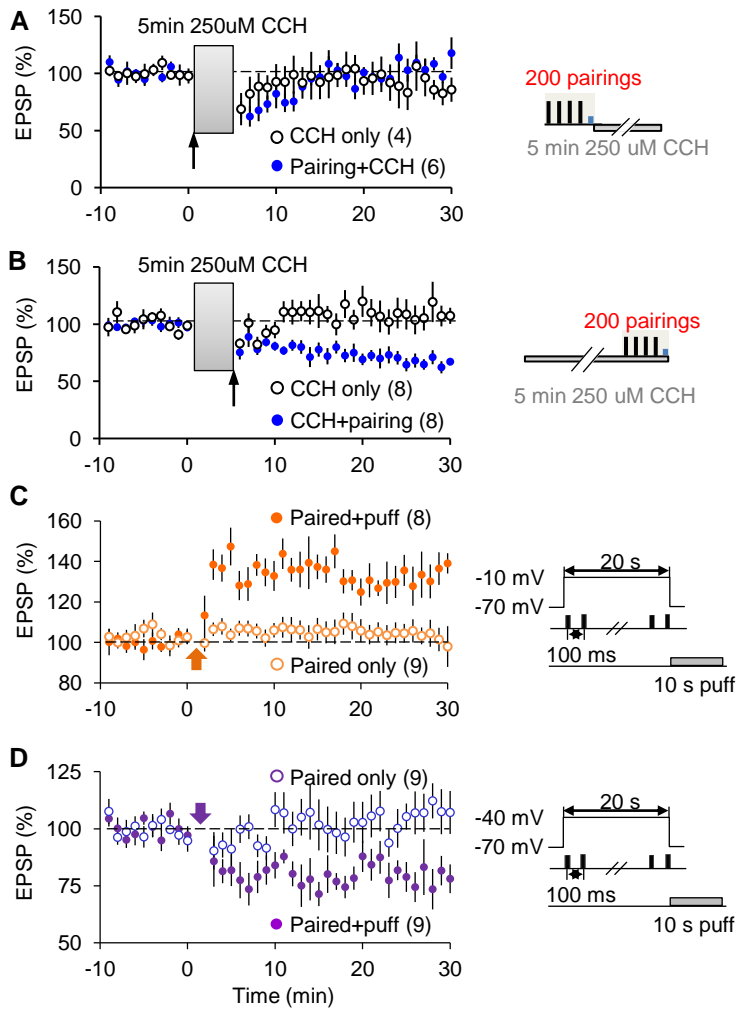

Fig S1

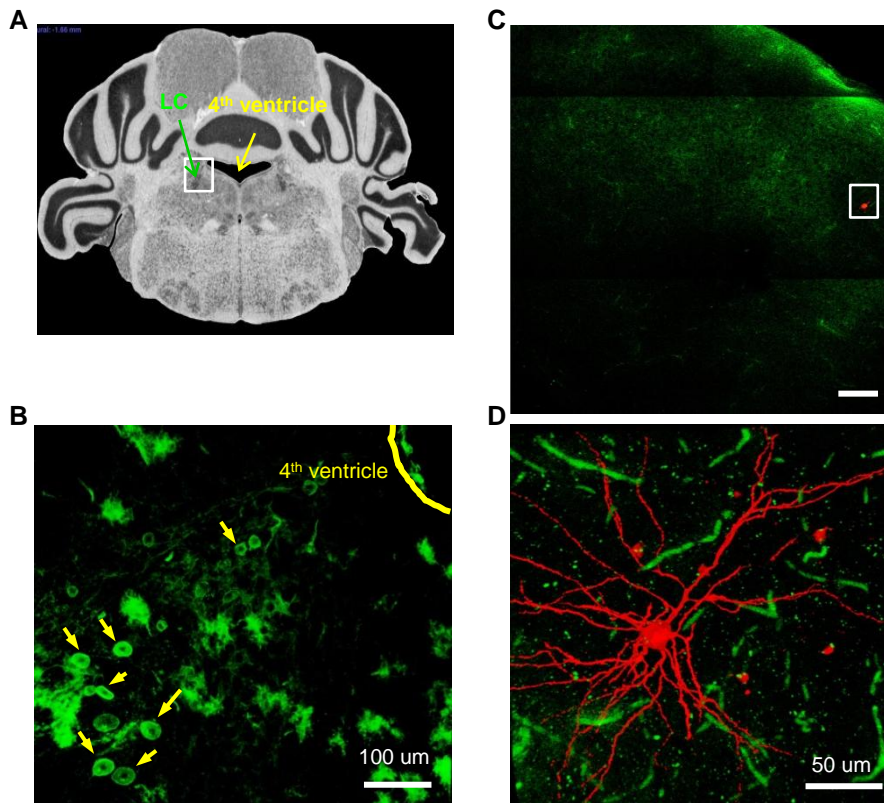

Fig S2

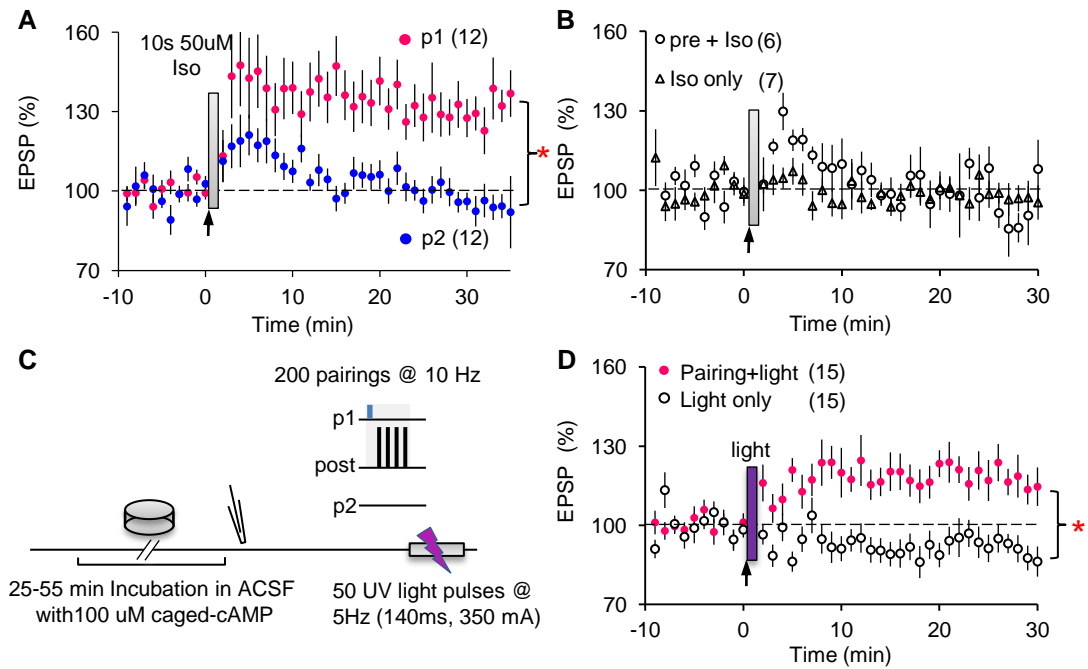

Fig S3

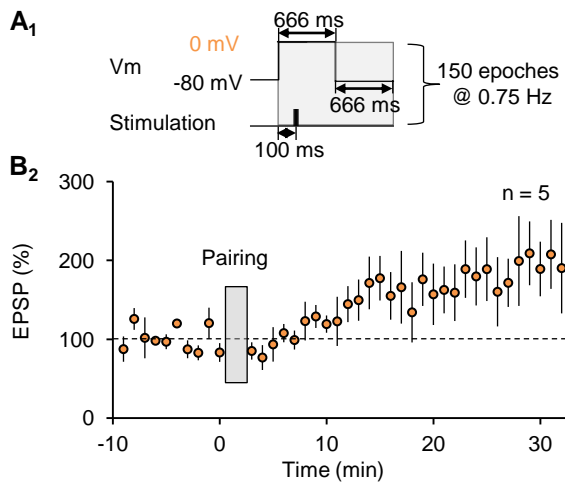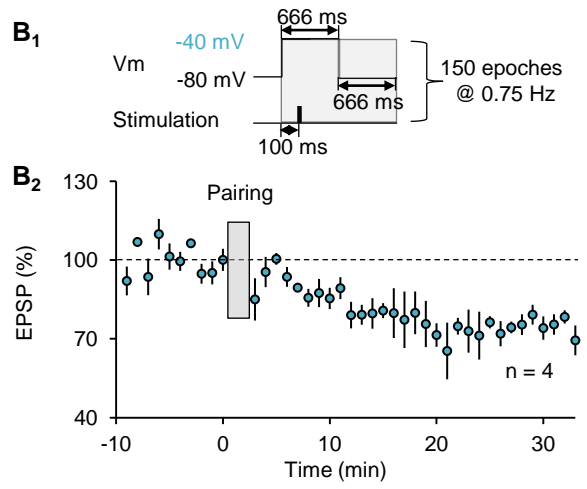

Fig S4

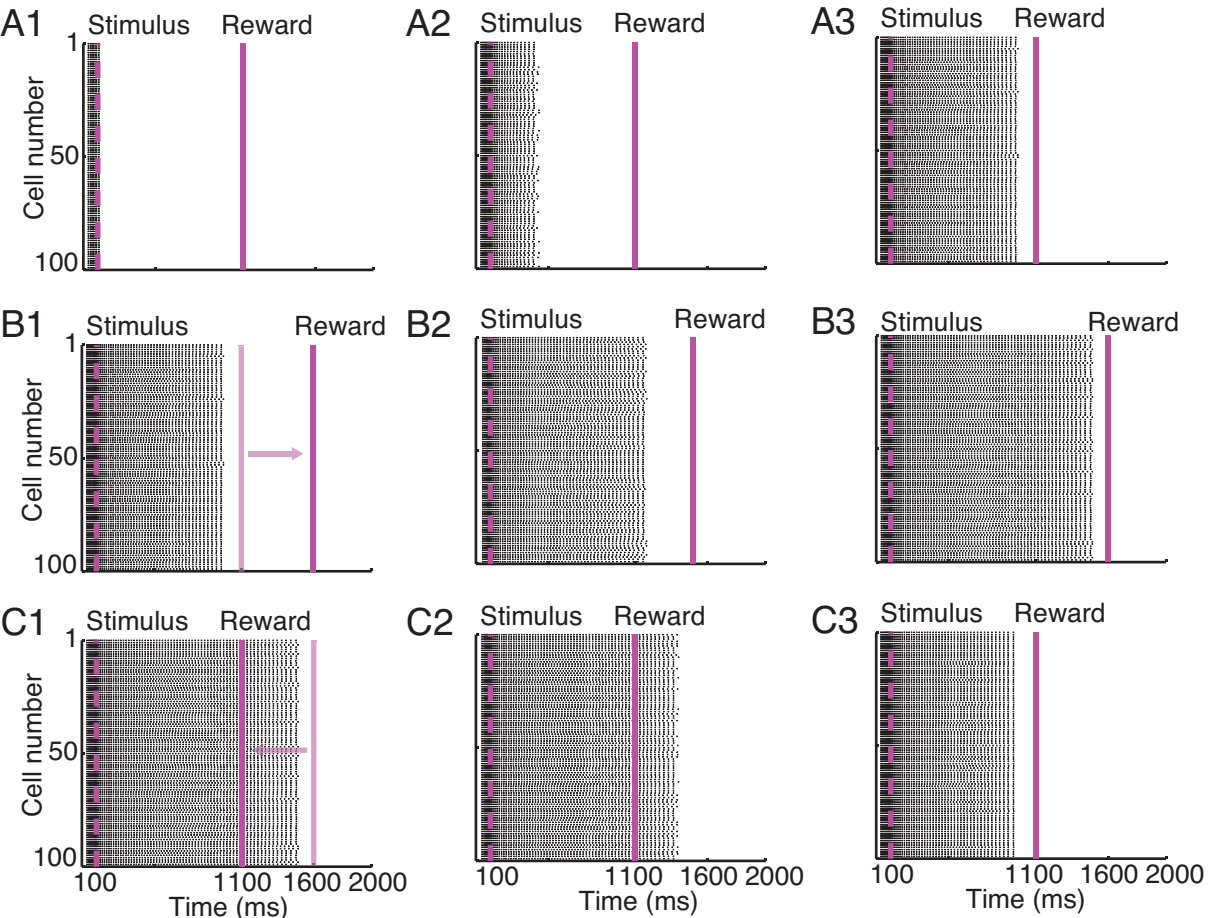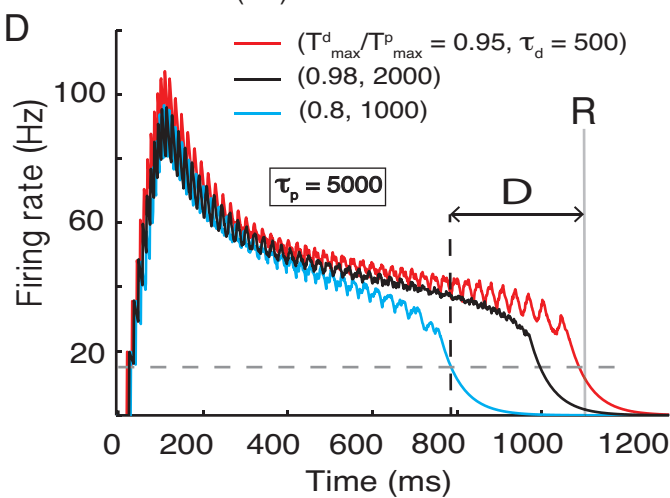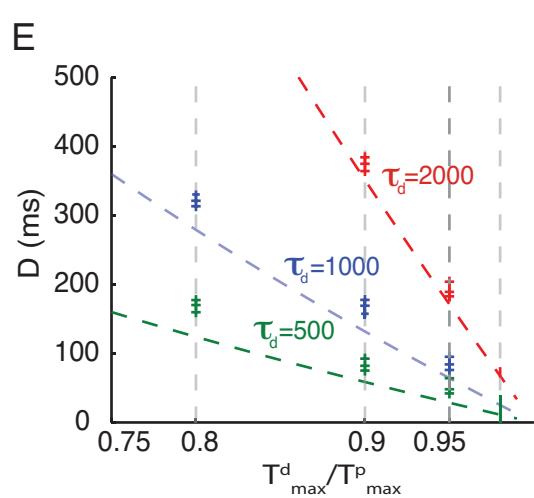

Supplement: NIHMS726142-supplement.pdf [file NIHMS726142-supplement.pdf]
